# Supplementary material
Source: ML conference proceedings conference paper supplement (https://openreview.net/forum?id=9-LSfSU74n-)
Supplement: supplementary_material [file attachment]

## A Appendix for "A Dataset for Answering Time-Sensitive Questions"

### A.1 Dataset documentation and intended uses

We follow datasheets for datasets guideline to document the followings.

#### A.1.1 Motivation

- For what purpose was the dataset created? Was there a specific task in mind? Was there a specific gap that needed to be filled?  
TimeQA is created to test current models' capability to perform diverse temporal reasoning under unstructured text corpus, which can help future NLP models to better capture the time dimension.
- Who created the dataset (e.g., which team, research group) and on behalf of which entity (e.g., company, institution, organization)?  
UCSB NLP team, mostly Wenhui Chen

#### A.1.2 Composition

- What do the instances that comprise the dataset represent (e.g., documents, photos, people, countries)? Are there multiple types of instances (e.g., movies, users, and ratings; people and interactions between them; nodes and edges)?  
TimeQA only contains documents (text) in the dataset.
- How many instances are there in total (of each type, if appropriate)?  
There are roughly 20K question-answer pairs.
- Does the dataset contain all possible instances or is it a sample (not necessarily random) of instances from a larger set? If the dataset is a sample, then what is the larger set? Is the sample representative of the larger set (e.g., geographic coverage)? If so, please describe how this representativeness was validated/verified. If it is not representative of the larger set, please describe why not (e.g., to cover a more diverse range of instances, because instances were withheld or unavailable).  
It's sampled from large Wikipedia passages, it's representative of all the possible temporal-sensitive information.
- Are relationships between individual instances made explicitly (e.g., users' movie ratings, social network links)? If so, please describe how these relationships are made explicit.  
N/A.
- Are there recommended data splits (e.g., training, development/validation, testing)? If so, please provide a description of these splits, explaining the rationale behind them.  
Yes, we split training, development, and testing set. We split randomly within each data source.
- Are there any errors, sources of noise, or redundancies in the dataset? If so, please provide a description.  
There could have some potential noise of question or answer annotation.
- Is the dataset self-contained, or does it link to or otherwise rely on external resources (e.g., websites, tweets, other datasets)? If it links to or relies on external resources, a) are there guarantees that they will exist, and remain constant, over time; b) are there official archival versions of the complete dataset (i.e., including the external resources as they existed at the time the dataset was created); c) are there any restrictions] (e.g., licenses, fees) associated with any of the external resources that might apply to a future user? Please provide descriptions of all external resources and any restrictions associated with them, as well as links or other access points, as appropriate.  
TimeQA is self-contained.
- Does the dataset contain data that might be considered confidential (e.g., data that is protected by legal privilege or by doctor-patient confidentiality, data that includes the content of individuals' non-public communications)? If so, please provide a description.  
No, all the samples in TimeQA is public available.

- Does the dataset contain data that, if viewed directly, might be offensive, insulting, threatening, or might otherwise cause anxiety? If so, please describe why.  
No
- Does the dataset relate to people? If not, you may skip the remaining questions in this section.  
No

### **A.1.3 Uses**

- Has the dataset been used for any tasks already? If so, please provide a description?  
It is proposed to use for QA task.
- Is there a repository that links to any or all papers or systems that use the dataset? If so, please provide a link or other access point.  
It is a new dataset. We run existing state-of-the-art models and release the code at <https://github.com/wenhuchen/Time-Sensitive-QA>
- What (other) tasks could the dataset be used for?  
Many other tasks like relation extractions can be also used.
- Is there anything about the composition of the dataset or the way it was collected and preprocessed/cleaned/labeled that might impact future uses? For example, is there anything that a future user might need to know to avoid uses that could result in unfair treatment of individuals or groups (e.g., stereotyping, quality of service issues) or other undesirable harms (e.g., financial harms, legal risks) If so, please provide a description. Is there anything a future user could do to mitigate these undesirable harms?  
N/A
- Are there tasks for which the dataset should not be used? If so, please provide a description.  
N/A

### **A.1.4 Distribution**

- Will the dataset be distributed to third parties outside of the entity (e.g., company, institution, organization) on behalf of which the dataset was created? If so, please provide a description.  
No.
- How will the dataset will be distributed (e.g., tarball on website, API, GitHub)? Does the dataset have a digital object identifier (DOI)?  
Release on Github. No DOI
- When will the dataset be distributed?  
It is released in <https://github.com/wenhuchen/Time-Sensitive-QA>
- Will the dataset be distributed under a copyright or other intellectual property (IP) license, and/or under applicable terms of use (ToU)? If so, please describe this license and/or ToU, and provide a link or other access point to, or otherwise reproduce, any relevant licensing terms or ToU, as well as any fees associated with these restrictions.  
BSD 3-Clause "New" or "Revised" License. <https://github.com/wenhuchen/Time-Sensitive-QA/blob/main/LICENSE>
- Have any third parties imposed IP-based or other restrictions on the data associated with the instances? If so, please describe these restrictions, and provide a link or other access point to, or otherwise reproduce, any relevant licensing terms, as well as any fees associated with these restrictions.  
No.
- Do any export controls or other regulatory restrictions apply to the dataset or to individual instances? If so, please describe these restrictions, and provide a link or other access point to, or otherwise reproduce, any supporting documentation. No.

### **A.1.5 Accessibility**

- Links to access the dataset and its metadata: the github repository <https://github.com/wenhuchen/Time-Sensitive-QA>.
- The data is saved in a json format, where an example is shown in the README.md file.

- UCSB NLP group will maintain this dataset on the Github account.
- BSD 3-Clause "New" or "Revised" License <https://github.com/wenhuchen/Time-Sensitive-QA/blob/main/LICENSE>

## A.2 Evaluation Metrics

The F1 score is calculated with the following equation to cover the ‘[unanswerable]’ case.

$$F1(\hat{A}_j^{(i)}, \hat{A}^{(i)}) = \begin{cases} 1, & \text{if } \hat{A}_j^{(i)} = NULL \ \& \ \hat{A}^{(i)} = NULL \\ 0, & \text{if } \hat{A}_j^{(i)} = NULL \ \& \ \hat{A}^{(i)} \neq NULL \\ 0, & \text{if } \hat{A}_j^{(i)} \neq NULL \ \& \ \hat{A}^{(i)} = NULL \\ f1(\hat{A}_j^{(i)}, \hat{A}^{(i)}), & \text{if } \hat{A}_j^{(i)} \neq NULL \ \& \ \hat{A}^{(i)} \neq NULL \end{cases}$$

## A.3 Annotation Interface

The annotation interface is demonstrated in Figure 8, the original HIT job url is [https://s3.amazonaws.com/mturk\\_bulk/hits/467870457/JV\\_fEwGzVy\\_PgHqtWqWXLA.html](https://s3.amazonaws.com/mturk_bulk/hits/467870457/JV_fEwGzVy_PgHqtWqWXLA.html).

**Survey Instructions**

The task is to answer questions from the given passage, we also provide you with 'suggested answer' to help you answer the given question. You are supposed to **answer the question by using your cursor/mouse to select a minimum span from the given passage, no need to type in the answer yourself**. If the question is not answerable at all, you can just leave it blank. Please watch the following video for detailed instruction:

Click to expand/collapse the Wikipedia Passage

• Question: What position was held by George Washington from June 1775 to 1783? (Suggested Answer: United Commander in Chief)  
☐ From  to  Answer

• Question: What position was held by George Washington from 1788 to 1797? (Suggested Answer: Unanswerable)  
☐ From  to  Answer

• Question: What position was held by George Washington from 1788 to 1797? (Suggested Answer: President)  
☐ From  to  Answer

• Question: What position was held by George Washington from April 1752 to June 1753? (Suggested Answer: Chancellor)  
☐ From  to  Answer

• Question: Where did George Washington often visit in 1786? (Suggested Answer: Mount Vernon and Belvoir)  
☐ From  to  Answer

• Question: What position was held by George Washington from April 1788 to June 1789? (Suggested Answer: Chancellor ; President)  
☐ From  to  Answer

• Question: S:question? (Suggested Answer: S:answer)  
☐ From  to  Answer

Read the given questions and the corresponding passage to provide answers for them. **The provided 'suggested answers' are mostly useful, but sometimes wrong, please only use it as a reference to help you navigate.**

If answerable, please 1) toggle the button, 2) move your cursor over the passage to select an answer span from the given passage, 3) toggle the button again to finalize your answer. If there are more than one answer, please use Add button to provide all possible answers.

If not answerable, you should just leave it blank.

Click to expand/collapse the Wikipedia Passage

**DO NOT FILL IN THE FOLLOWING FORMS BY YOURSELF, USE YOUR CURSOR TO SELECT THE ANSWER, THE FORMS WILL BE AUTO-FILLED! DO NOT MODIFY THE ANSWER BY YOURSELF AFTER SELECTION!**

• Question: Which team did Marek Štěch play for from 2006 to 2007? (Suggested Answer: Czech Republic U17)  
☐ Span:  -  Answer

• Question: Which team did the player Marek Štěch belong to from 2008 to 2009? (Suggested Answer: West Ham United FC)  
☐ Span:  -  Answer

• Question: Which team did the player Marek Štěch belong to from 2009 to 2012? (Suggested Answer: Czech Republic U17)  
☐ Span:  -  Answer

• Question: Which team did the player Marek Štěch belong to from 2012 to 2014? (Suggested Answer: Yeovil Town)  
☐ Span:  -  Answer

• Question: Which team did Marek Štěch play for from 2014 to 2015? (Suggested Answer: Czech First League)  
☐ Span:  -  Answer

Figure 8: The annotation interface for crowd workers.

#### A.4 Relation Distribution over TimeQA

The annotated time-evolving facts include more than 70 relations, which follows a long-tail distribution. The major relations are shown in Figure 9, where the dominant relations are ‘P54’ (play for), ‘P39’ (position held), ‘P108’ (employer of), ‘P69’ (educated at).

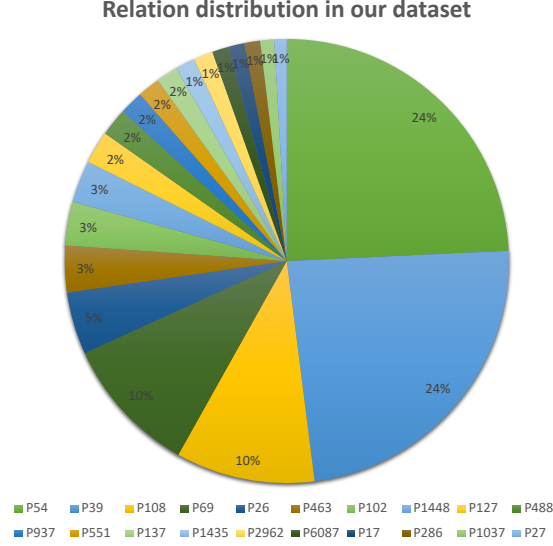

Figure 9: The relation distribution over the annotated facts.

#### A.5 Answerable vs. Unanswerable

We also provide break-down analysis of model performance for answerable and unanswerable questions in Figure 10. As can be seen, the FiD is more aware of the answerability on TimeQA. On the easy and hard mode, FiD’s accuracy on unanswerable is above BigBird’s by 14% and 18%, while the gap in answerable questions are less significant.

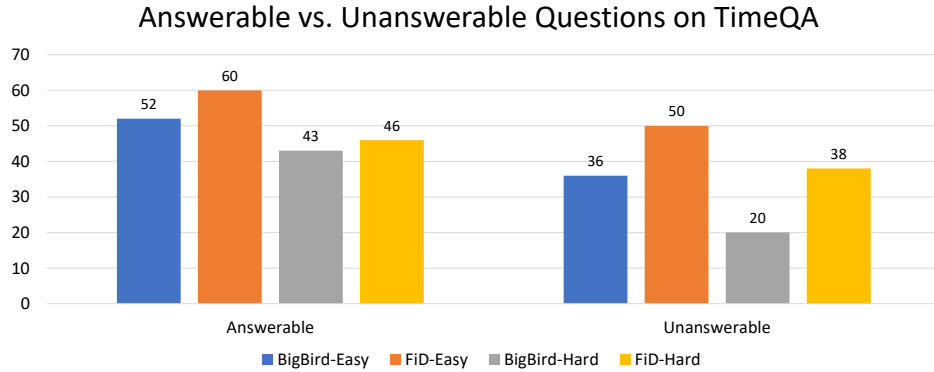

Figure 10: The answerable and unanswerable question performance for BigBird and FiD.
